# Supplementary material for: Effects of Citicoline, Homotaurine, and Vitamin E on Contrast Sensitivity and Visual-Related Quality of Life in Patients with Primary Open-Angle Glaucoma: A Preliminary Study
Source: MDPI journal article supplement (doi:10.3390/molecules25235614), 2020-11-29
Supplement: s1 [file s1]

### The Glaucoma Quality of Life-15 questionnaire

| <b>Does your vision give you any difficulty, even with glasses, with the following activities?</b> | <b>None</b> | <b>A little bit</b> | <b>Some</b> | <b>Quite a lot</b> | <b>Severe</b> | <b>Do not perform for nonvisual reasons</b> |
|----------------------------------------------------------------------------------------------------|-------------|---------------------|-------------|--------------------|---------------|---------------------------------------------|
| Reading newspapers                                                                                 | 1           | 2                   | 3           | 4                  | 5             | 0                                           |
| Walking after dark                                                                                 | 1           | 2                   | 3           | 4                  | 5             | 0                                           |
| Seeing at night                                                                                    | 1           | 2                   | 3           | 4                  | 5             | 0                                           |
| Walking on uneven ground                                                                           | 1           | 2                   | 3           | 4                  | 5             | 0                                           |
| Adjusting to bright lights                                                                         | 1           | 2                   | 3           | 4                  | 5             | 0                                           |
| Adjusting to dim lights                                                                            | 1           | 2                   | 3           | 4                  | 5             | 0                                           |
| Going from light to dark room or vice versa                                                        | 1           | 2                   | 3           | 4                  | 5             | 0                                           |
| Tripping over objects                                                                              | 1           | 2                   | 3           | 4                  | 5             | 0                                           |
| Seeing objects coming from the side                                                                | 1           | 2                   | 3           | 4                  | 5             | 0                                           |
| Crossing the road                                                                                  | 1           | 2                   | 3           | 4                  | 5             | 0                                           |
| Walking on steps/stairs                                                                            | 1           | 2                   | 3           | 4                  | 5             | 0                                           |
| Bumping into objects                                                                               | 1           | 2                   | 3           | 4                  | 5             | 0                                           |
| Judging distance of foot to step/curb                                                              | 1           | 2                   | 3           | 4                  | 5             | 0                                           |
| Finding dropped objects                                                                            | 1           | 2                   | 3           | 4                  | 5             | 0                                           |
| Recognizing faces                                                                                  | 1           | 2                   | 3           | 4                  | 5             | 0                                           |
